# Supplementary material for: Nucleolar small molecule RNA SNORA75 promotes endometrial receptivity by regulating the function of miR-146a-3p and ZNF23
Source: Aging (Albany NY). 2021 May 24;13(11):14924–39. doi: 10.18632/aging.203007 (PMC8221328; doi:10.18632/aging.203007)
Supplement: Supplementary Figures [file aging-13-203007-s001.pdf]

## SUPPLEMENTARY FIGURES

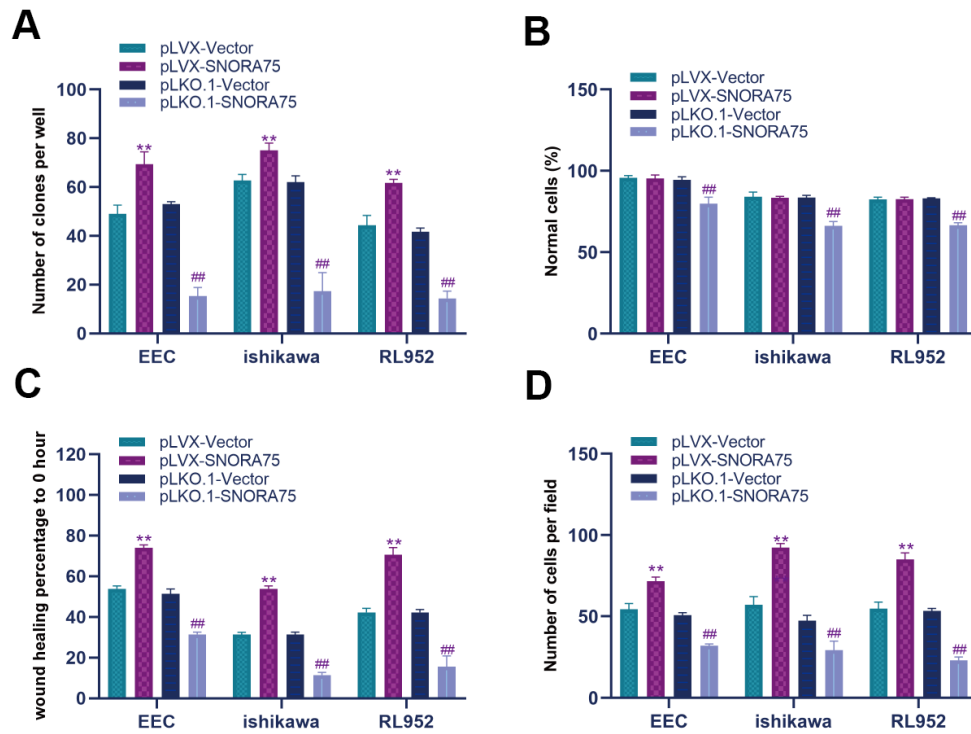

**Supplementary Figure 1. Statistical analyses the effect of SNORA75 on the proliferation, migration and invasion of endometrial epithelial cells.** (A) Statistical analyses the colony formation of EEC, Ishikawa and RL952 cells. (B) Statistical analyses the apoptosis of EEC, Ishikawa and RL952 cells. (C) Statistical analyses the migration of EEC, Ishikawa and RL952 cells. (D) Statistical analyses the invasion of EEC, Ishikawa and RL952 cells. "###" indicates that, compared with the pLKO.1-vector group,  $P < 0.01$ . "\*\*\*\*" indicates that, compared with the pLVX-vector group,  $P < 0.01$ .

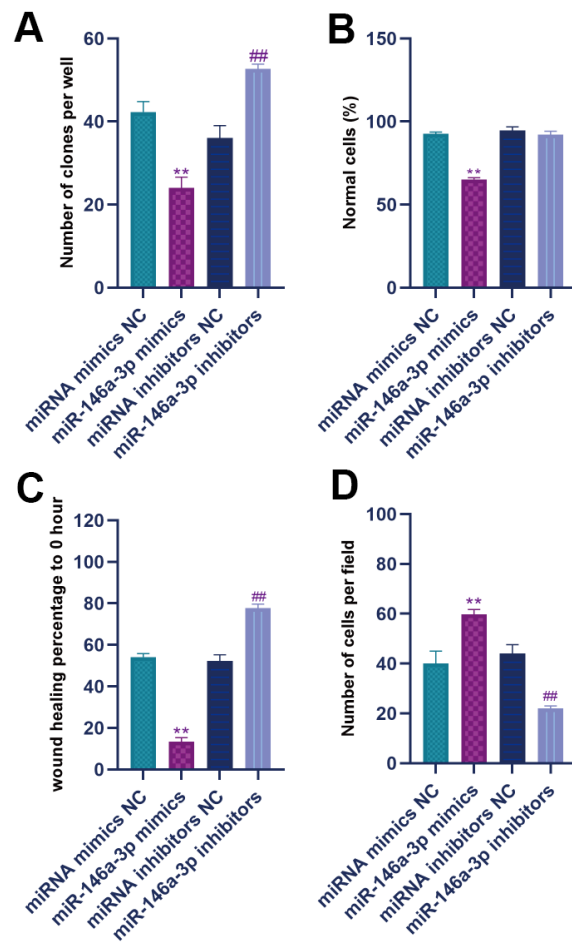

**Supplementary Figure 2. Statistical analyses the effect of miR-146a-3p on the proliferation, migration and invasion of endometrial epithelial cells.** (A) Statistical analyses the colony formation of EEC cells. (B) Statistical analyses the apoptosis of EEC cells. (C) Statistical analyses the migration of EEC cells. (D) Statistical analyses the invasion of EEC cells. "###" indicates that, compared with the pLKO.1-vector group,  $P < 0.01$ . "\*\*\*\*" indicates that, compared with the pLVX-vector group,  $P < 0.01$ .
